# Supplementary material for: Phototropin-mediated perception of light direction in leaves regulates blade flattening
Source: PubMed Central journal article supplement — Plant Physiol. 2021 Sep 4;187(3):1235–49. doi: 10.1093/plphys/kiab410 (PMC8567070; doi:10.1093/plphys/kiab410), 2021-09-04
Supplement: kiab410_supplementary_data.pdf [file kiab410_supplementary_data.pdf]

## **Supplemental information**

Phototropin-mediated perception of light direction in Arabidopsis leaves regulates blade flattening

Martina Legris<sup>a</sup>, Bogna Maria Szarzynska-Erden<sup>a</sup>, Martine Trevisan<sup>a</sup>, Laure Allenbach-Petrolati<sup>a</sup> and Christian Fankhauser<sup>a\*</sup>

**Supplemental figure S1** – Light treatments and growth conditions

**Supplemental figure S2** – Expression levels and distribution pattern of *pAS2* and *pFIL* lines

**Supplemental figure S3** – PHOT1 levels decrease with BL in the leaf blade

**Supplemental figure S4** – Phototropins control flattening reversibly and late in development

**Supplemental figure S5** - DR5:VENUS signal is detected in the epidermis.

**Supplemental table S1** - Genotyping conditions to select mutations in crosses

**Supplemental table S2** – Primers used in this study

**Supplemental table S3** – Full ANOVA results for figure 1E

**Supplemental table S4** – Full ANOVA results for figure 2A

**Supplemental table S5** – Full ANOVA results for figure 3D

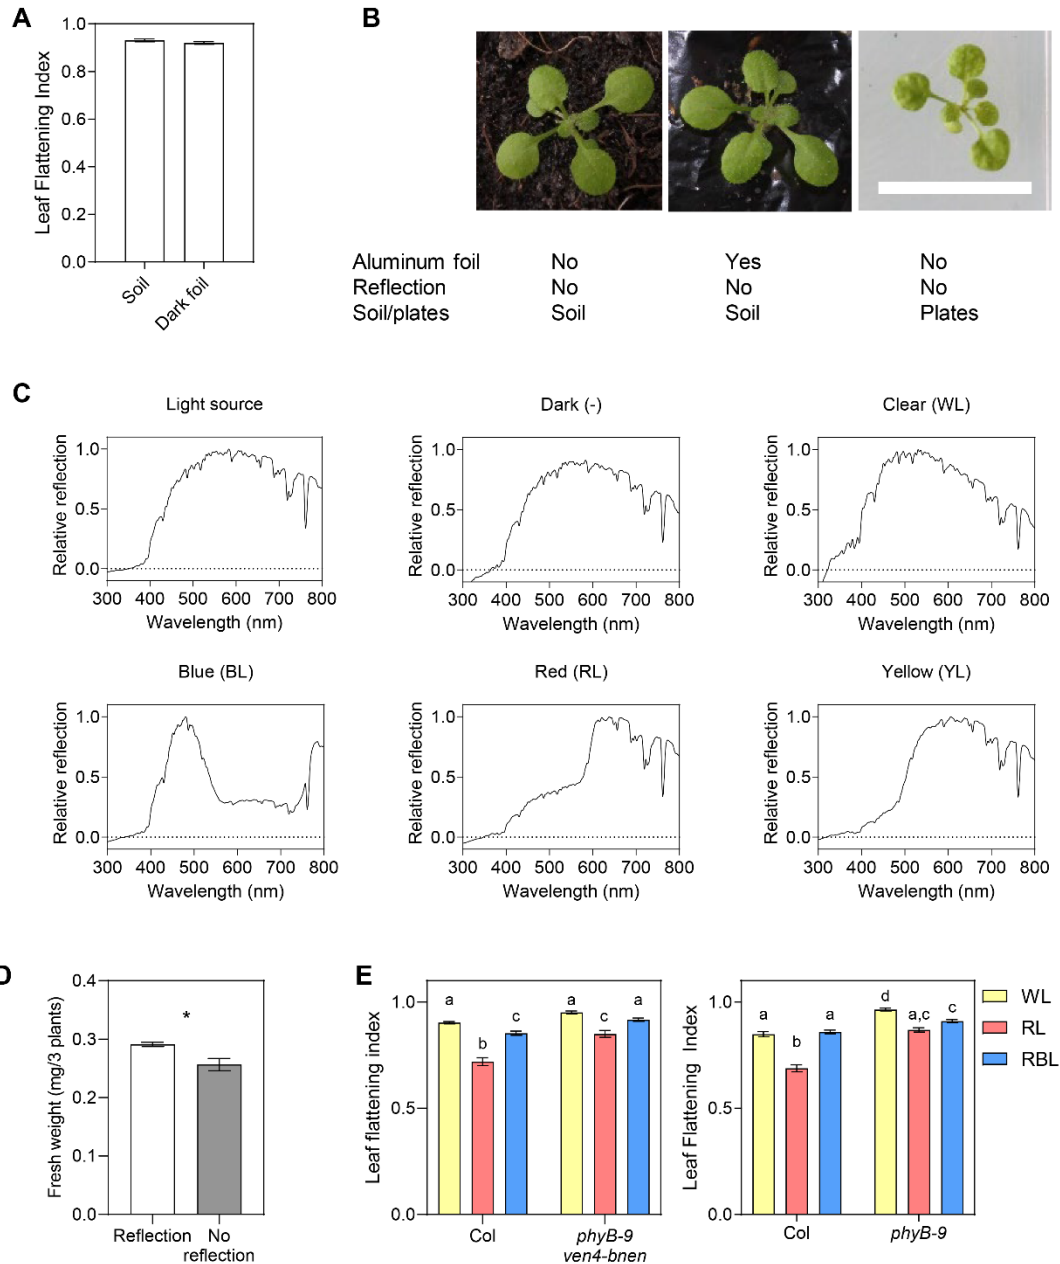

### Supplemental figure S1 – Light treatments and growth conditions

A- Dark aluminum foil does not affect leaf shape compared to soil. Col plants grown for three weeks on soil or on soil covered with dark aluminum foil. Leaf flattening index (mean  $\pm$ SE) of 22-32 leaves.

B- Images of Col plants grown in various conditions. Note that the presence of dark aluminum foil does not affect plant morphology, while plants grown in plates have smaller round leaf blades, with irregular surfaces, and thinner petioles than those grown on soil. Scale bar: 2cm.

C- Spectra of reflected light by colored aluminum foil. Colored aluminum foil was placed in front of a light source and the reflected light was measured. Top left, spectrum of the light source. To facilitate comparison of the shape of the spectra among colors in each case the spectrum plotted is relative to the maximum value.

D- Fresh weight of Col plants grown for 19 days on soil covered by dark (No reflection) or clear (Reflection) aluminum foil. Data are mean  $\pm$ SE of 10 replicates, each consisting of 3 plants. \*  $p < 0.05$  in a T-test.

E- The *ven4-bnen* mutation does not affect phyB leaf flattening. Plants grown for two weeks and transferred to WL, RL or RBL for one week. Left panel: *phyB-9 ven4-bnen*. Right panel: *phyB-9* without the *ven4* mutation. Bars represent mean  $\pm$ SE of 22-28 leaves (left) and 37-48 leaves (right). Different letters represent significant differences among means ( $p < 0.05$ ) in an ANOVA followed by Tukey's test.

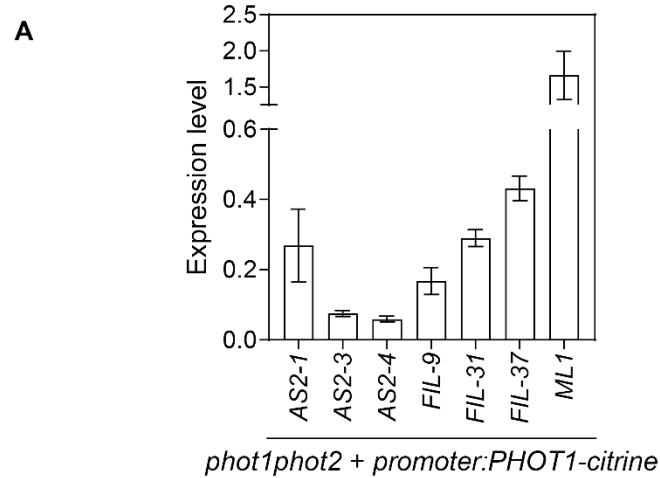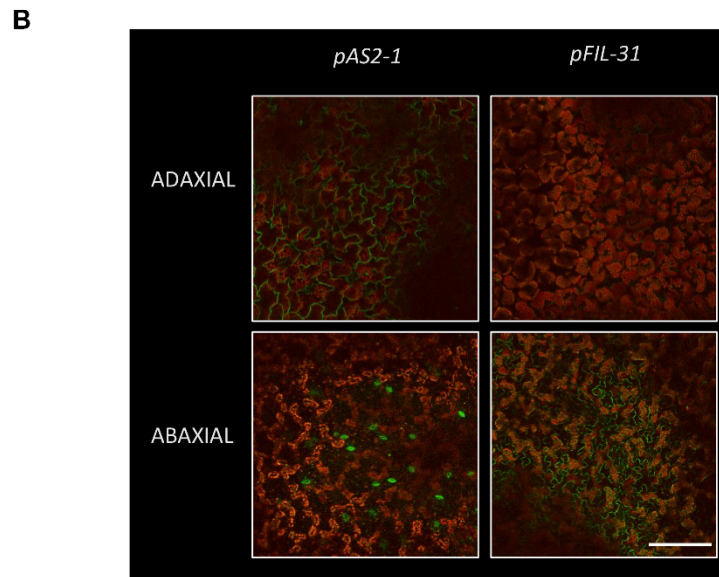

**Supplemental figure S2** – Expression levels and distribution pattern of *pAS2* and *pFIL* lines

A- Expression levels of *pAS2* and *pFIL* lines determined by RT-qPCR. Each bar represents mean  $\pm$ SE of three biological replicates.

B- Confocal microscopy images of leaf blades of plants expressing *PHOT1-citrine* under various promoters. The same leaf was imaged on the adaxial and the abaxial side. Scale bar: 200 $\mu$ m.

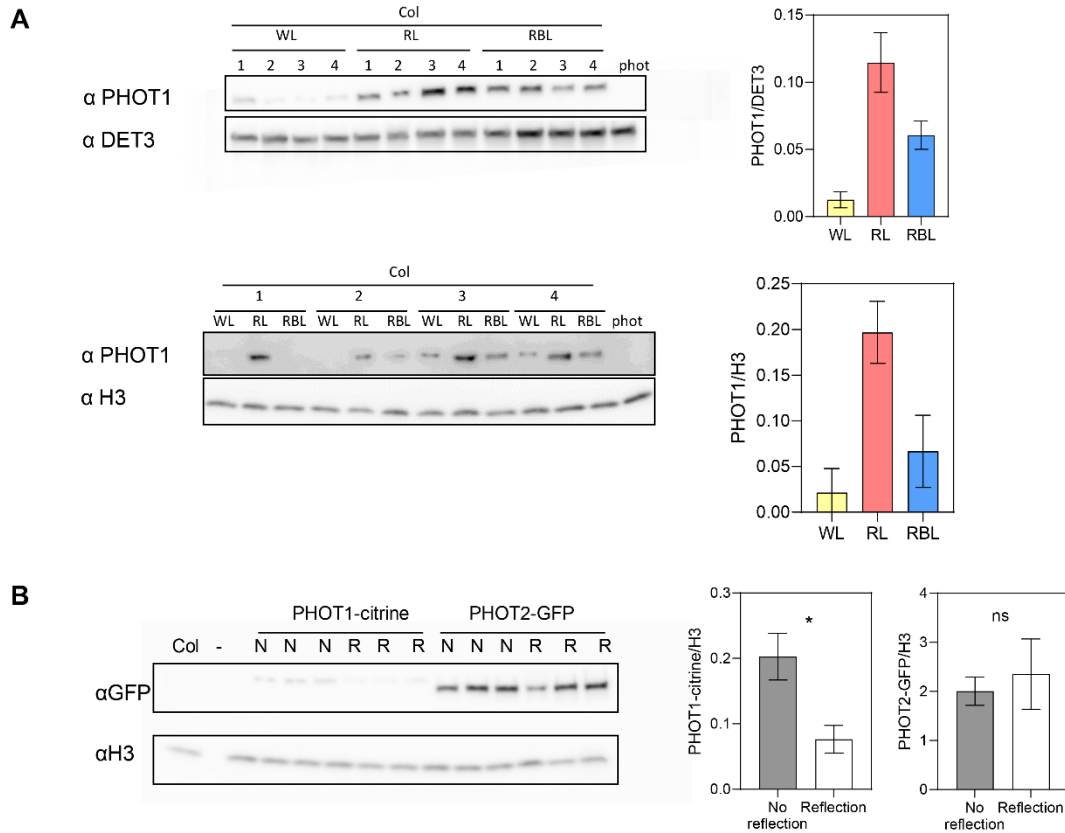

**Supplemental figure S3 – PHOT1 levels decrease with BL in the leaf blade**

A- PHOT1 levels decrease with BL in Col Plants grown for two weeks and transferred to WL, RL or RBL for one day. Membranes were probed with anti-PHOT1 and anti-DET3 or anti-Histone3 (H3) antibodies. Right: Quantification of the western blot. Each bar represents mean  $\pm$ SE of four replicates.

B- Plants expressing *pML1:PHOT1-citrine* or *pCER6:PHOT2-GFP* grown for two weeks in soil covered with dark (No reflection) or clear (Reflection) aluminum foil. Membranes were probed with anti-GFP and anti-H3 antibodies. N: No reflection, R: Reflection. Right: Quantification of the western blot. Each bar represents mean  $\pm$ SE of three replicates. \*  $p < 0.05$  in a T-test. The experiment was repeated three times with similar results.

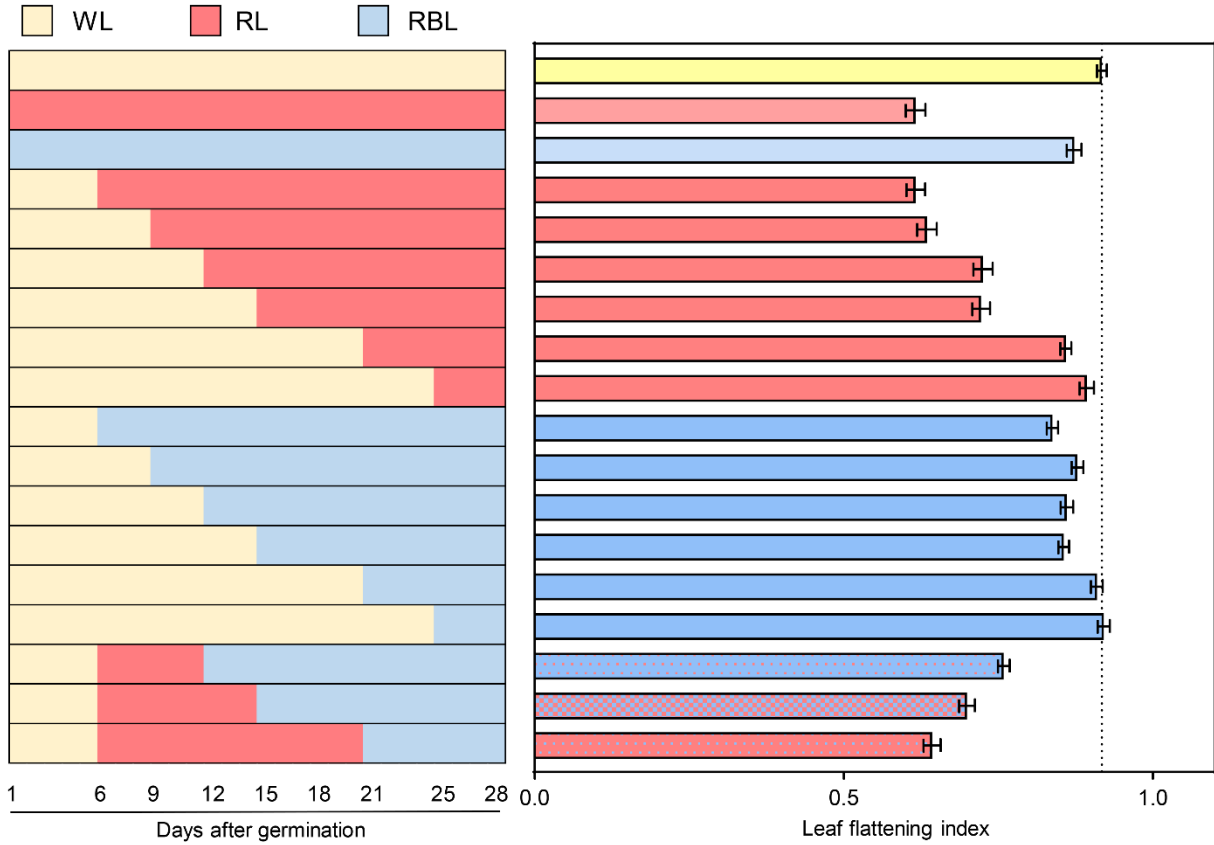

**Supplemental figure S4** – Phototropins control flattening reversibly and late in development  
 Leaf flattening index of Col plants grown on soil and transferred to WL, RL or RBL at different time points. Measurements were done 28 days after germination. Bars represent mean  $\pm$ SE of 24 – 48 leaves. Left: scheme of the treatments.

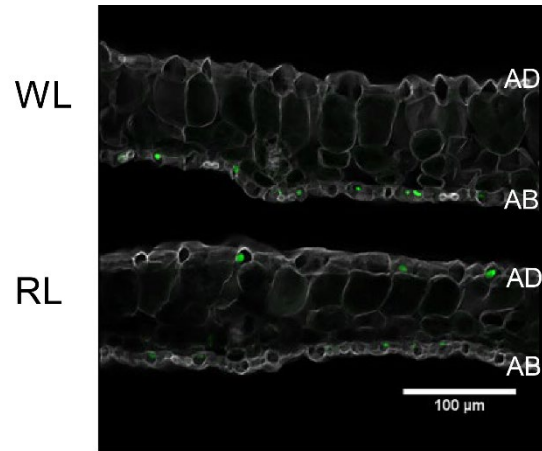

**Supplemental figure S5** - DR5:VENUS signal is detected in the epidermis.

Plants expressing DR5:VENUS (green) were grown for two weeks and transferred to WL or RL for one week. Leaves 1 and 2 were fixed and stained with calcofluor white (grays). Adaxial and abaxial epidermal layers are labeled as AD and AB respectively.

| <b>Allele</b> | <b>PCR conditions</b>                    | <b>Digestion enzyme</b> | <b>Result</b>                                   |
|---------------|------------------------------------------|-------------------------|-------------------------------------------------|
| pks1-1        | CF82 + CF93 55°C<br>JMRB1 + CF123 55°C   |                         | WT = 400bp<br>mutant = 600pb                    |
| pks2-1        | CF136 + CF330, 55°C<br>CF136 + LB1, 55°C |                         | WT= 306bp<br>mutant=250bp                       |
| pks3-9        | CF403 + CF522, 55°C                      | Hinf1                   | WT : 69 + 133<br>pks3-9 : 202                   |
| pks4-1        | CF329 + AH021, 55°C<br>CF329 + LB1, 55°C |                         | WT= 560bp<br>mutant= 450bp                      |
| phot1-5       | CF342 + CF343 + CF344 + CF345, 55°C      |                         | WT = 250 bp + 450 bp<br><i>phot1-5</i> = 250 bp |
| phot2-1       | CF346 + CF347, 55°C                      | Mbo1                    | WT = 398 +230+120<br><i>phot2-1</i> = 530+230   |

**Supplemental table S1** - Genotyping conditions to select mutations in crosses



| <b>Gene/Allele</b> | <b>Primer</b> | <b>Sequence</b>                |
|--------------------|---------------|--------------------------------|
| Citrine            | LAP038        | TACGGCCTGATGTGCTTCG            |
|                    | LAP045        | GTCTTGTAGTTGCCGTCGTC           |
| GAPDH              | FW            | GCAAAATGGCTGACAAGAAGATC        |
|                    | RV            | AGCAACCAAACGACCGATTTC          |
| UBC                | FW            | CAGTCTGTGTGTAGAGCTATCATAGCAT   |
|                    | RV            | AGAAGATTCCCTGAGTCGCAGTT        |
| YLS8               | FW            | TCATTTCGTTTCGGCCATGA           |
|                    | RV            | CTCAGCAACAGACGCAAGCA           |
| pks1-1             | CF82          | CTGGGTTTGTTCAGAGACAGA          |
|                    | CF93          | CCCTAATTCCACATATCTACACACAAGCAA |
|                    | JMRB1         | GCTCATGATCAGATTGTCGTTTCCCGCCTT |
|                    | CF123         | TCCTTTCTTTTGTGGTCACGGGGGTAACA  |
| pks2-1             | CF136         | GCAAGGCAAGGAAGTAGTGA           |
|                    | CF330         | AGCTCGGTGTTCTGTTTCATG          |
|                    | LB1           | AATCAGCTGTTGCCCGTCTC           |
| pks3-9             | CF403         | CTGACAATGACGCCGAGATTG          |
|                    | CF522         | GATCTTGACGACGTCGTTTTTCG        |
| pks4-1             | CF329         | CTTGGGACTCGTAGGATTCA           |
|                    | AH021         | ACGAGGAATCTAAGTGGTCC           |
|                    | LB1           | AATCAGCTGTTGCCCGTCTC           |
| phot1-5            | CF342         | TGTTGGCATCAGGAAGTT             |
|                    | CF343         | TGTGGCAGGAAAGAAGTT             |
|                    | CF344         | TGCCTGCAAACCAATAAC             |
|                    | CF345         | CCGGAGCAGGACATACG              |
| phot2-1            | CF346         | CTGCCTCACAATAAGGAGAG           |
|                    | CF347         | GAACCTTGCAGAGTCTTCTG           |

**Supplemental table S2** - Primers used in this study.

| <b>Source of Variation</b> | <b>P value</b> |
|----------------------------|----------------|
| Interaction                | <0,0001        |
| Genotype                   | <0,0001        |
| Light treatment            | <0,0001        |

| <b>Tukey's multiple comparisons test</b> | <b>Adjusted P Value</b> |
|------------------------------------------|-------------------------|
| <i>Col</i>                               |                         |
| WL vs. RL                                | <0,0001                 |
| WL vs. R+BL                              | 0.8155                  |
| RL vs. R+BL                              | <0,0001                 |
| <i>phyB</i>                              |                         |
| WL vs. RL                                | <0,0001                 |
| WL vs. R+BL                              | 0.0068                  |
| RL vs. R+BL                              | 0.0499                  |
| <i>phot1</i>                             |                         |
| WL vs. RL                                | <0,0001                 |
| WL vs. R+BL                              | <0,0001                 |
| RL vs. R+BL                              | <0,0001                 |
| <i>phot2</i>                             |                         |
| WL vs. RL                                | <0,0001                 |
| WL vs. R+BL                              | 0.1923                  |
| RL vs. R+BL                              | <0,0001                 |
| <i>phot1phot2</i>                        |                         |
| WL vs. RL                                | 0.3582                  |
| WL vs. R+BL                              | 0.9948                  |
| RL vs. R+BL                              | 0.3941                  |
| <i>cry1</i>                              |                         |
| WL vs. RL                                | <0,0001                 |
| WL vs. R+BL                              | 0.6667                  |
| RL vs. R+BL                              | <0,0001                 |
| <i>cry2</i>                              |                         |
| WL vs. RL                                | <0,0001                 |
| WL vs. R+BL                              | 0.9001                  |
| RL vs. R+BL                              | <0,0001                 |
| <i>cry1cry2</i>                          |                         |
| WL vs. RL                                | <0,0001                 |
| WL vs. R+BL                              | 0.9466                  |
| RL vs. R+BL                              | <0,0001                 |

**Supplemental table S3** – Full ANOVA results for figure 1E

| <b>Source of Variation</b> | <b>P value</b> |
|----------------------------|----------------|
| Interaction                | <0,0001        |
| Genotype                   | <0,0001        |
| Light treatment            | <0,0001        |

  

| <b>Tukey's multiple comparisons test</b> | <b>Adjusted P Value</b> |         |
|------------------------------------------|-------------------------|---------|
| <i>Col</i>                               | WL vs. RL               | <0,0001 |
|                                          | WL vs. RBL              | 0.9927  |
|                                          | RL vs. RBL              | <0,0001 |
| <i>phot2</i>                             | WL vs. RL               | <0,0001 |
|                                          | WL vs. RBL              | 0.2957  |
|                                          | RL vs. RBL              | <0,0001 |
| <i>phot1phot2</i>                        | WL vs. RL               | 0.9941  |
|                                          | WL vs. RBL              | 0.8402  |
|                                          | RL vs. RBL              | 0.7454  |
| <i>AS2-1</i>                             | WL vs. RL               | <0,0001 |
|                                          | WL vs. RBL              | 0.0545  |
|                                          | RL vs. RBL              | <0,0001 |
| <i>AS2-3</i>                             | WL vs. RL               | <0,0001 |
|                                          | WL vs. RBL              | 0.1749  |
|                                          | RL vs. RBL              | <0,0001 |
| <i>AS2-4</i>                             | WL vs. RL               | <0,0001 |
|                                          | WL vs. RBL              | 0.106   |
|                                          | RL vs. RBL              | <0,0001 |
| <i>FIL-9</i>                             | WL vs. RL               | <0,0001 |
|                                          | WL vs. RBL              | <0,0001 |
|                                          | RL vs. RBL              | 0.0023  |
| <i>FIL-31</i>                            | WL vs. RL               | <0,0001 |
|                                          | WL vs. RBL              | 0.6321  |
|                                          | RL vs. RBL              | <0,0001 |
| <i>FIL-37</i>                            | WL vs. RL               | <0,0001 |
|                                          | WL vs. RBL              | 0.0274  |
|                                          | RL vs. RBL              | <0,0001 |
| <i>ML1</i>                               | WL vs. RL               | <0,0001 |
|                                          | WL vs. RBL              | 0.133   |
|                                          | RL vs. RBL              | <0,0001 |
| <i>PHOT1</i>                             | WL vs. RL               | <0,0001 |
|                                          | WL vs. RBL              | 0.8321  |
|                                          | RL vs. RBL              | <0,0001 |

**Supplemental table S4** – Full ANOVA results for figure 2A

| <b>Source of Variation</b>               | <b>P value</b> |
|------------------------------------------|----------------|
| Interaction                              | <0,0001        |
| Genotype                                 | <0,0001        |
| Light treatment                          | <0,0001        |
| <b>Tukey's multiple comparisons test</b> |                |
| <b>Adjusted P Value</b>                  |                |
| Col                                      |                |
| WL vs. RL                                | <0,0001        |
| WL vs. RBL                               | 0.0033         |
| RL vs. RBL                               | <0,0001        |
| <i>phot1phot2</i>                        |                |
| WL vs. RL                                | 0.1217         |
| WL vs. RBL                               | 0.049          |
| RL vs. RBL                               | 0.9848         |
| <i>pks3-9</i>                            |                |
| WL vs. RL                                | 0.0002         |
| WL vs. RBL                               | 0.4926         |
| RL vs. RBL                               | 0.0221         |
| <i>pks3-10</i>                           |                |
| WL vs. RL                                | 0.0002         |
| WL vs. RBL                               | 0.6879         |
| RL vs. RBL                               | 0.0028         |
| <i>pks2</i>                              |                |
| WL vs. RL                                | <0,0001        |
| WL vs. RBL                               | 0.2157         |
| RL vs. RBL                               | <0,0001        |
| <i>pks2 pks3</i>                         |                |
| WL vs. RL                                | <0,0001        |
| WL vs. RBL                               | 0.0375         |
| RL vs. RBL                               | 0.014          |
| <i>pks1,2,3,4</i>                        |                |
| WL vs. RL                                | 0.9988         |
| WL vs. RBL                               | 0.7449         |
| RL vs. RBL                               | 0.7089         |
| <i>nph3-6</i>                            |                |
| WL vs. RL                                | <0,0001        |
| WL vs. RBL                               | <0,0001        |
| RL vs. RBL                               | 0.0658         |

**Supplemental table S5** – Full ANOVA results for figure 3D
